# Supplementary material for: Hydrogen bonding directed co-assembly of polyoxometalates and polymers to core–shell nanoparticles
Source: Royal Society of Chemistry journal article supplement (doi:10.1039/c8qm00291f), 2018-01-01
Supplement: c8qm00291f1.pdf [file c8qm00291f1.pdf]

## Electronic Supplementary Information

# Hydrogen Bonding Directed Co-Assembly of Polyoxometalates and Polymer to Core-Shell Nanoparticles

Jing Zhou,<sup>ab</sup> Jie Hu,<sup>a</sup> Mu Li,<sup>a</sup> Weiyu Wang,<sup>a</sup> Yuzi Liu,<sup>c</sup> Randall E. Winans,<sup>d</sup> Tao Li,<sup>\*de</sup> Tianbo Liu,<sup>\*b</sup> and Panchao Yin<sup>\*a</sup>

<sup>a</sup> *South China Advanced Institute for Soft Matter Science and Technology, and State Key Laboratory of Luminescent Materials and Devices, South China University of Technology, Guangzhou 510640, China*

<sup>b</sup> *Department of Polymer Science, The University of Akron, Akron, Ohio 44325-3909, USA*

<sup>c</sup> *Center for Nanoscale Materials, Advanced Photon Source, Argonne National Laboratory, Argonne, Illinois 60439, USA*

<sup>d</sup> *X-ray Science Division, Advanced Photon Source, Argonne National Laboratory, Argonne, Illinois 60439, USA*

<sup>e</sup> *Department of Chemistry and Biochemistry, Northern Illinois University, DeKalb, Illinois 60115, USA*

† E-mail: taoli@aps.anl.gov; tliu@uakron.edu; yinpc@scut.edu.cn

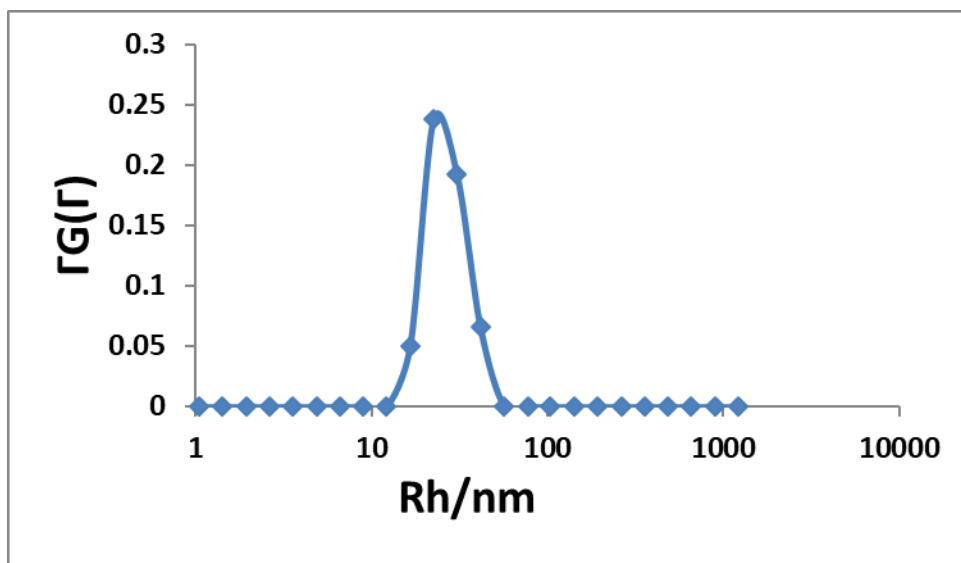

Fig. S1 DLS of P4VP-{SW} complex in aqueous solution.

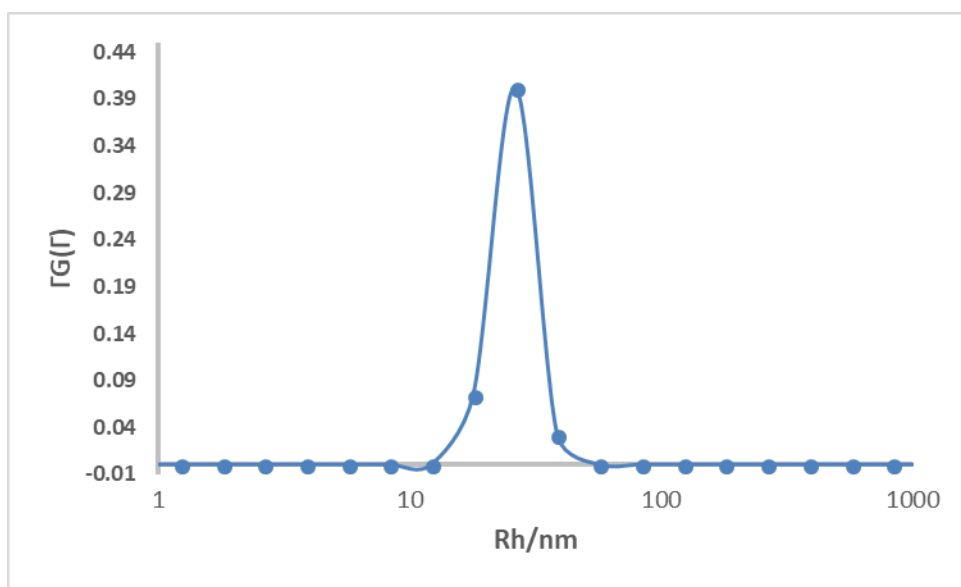

Figure S2 DLS of P4VP-{Mo<sub>72</sub>V<sub>30</sub>} complex in aqueous solution

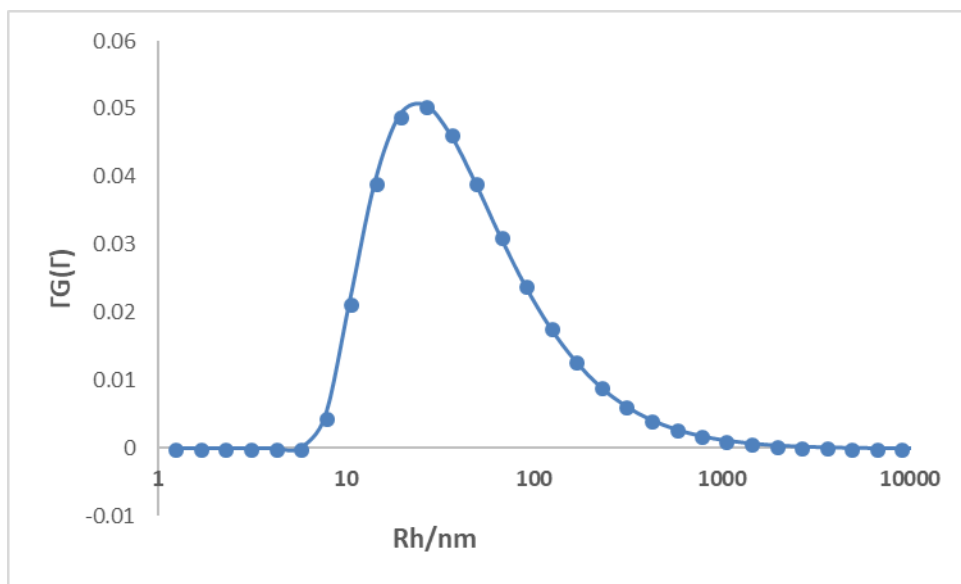

Figure S3 DLS of P4VP- $\{Keg\}$  complex in aqueous solution

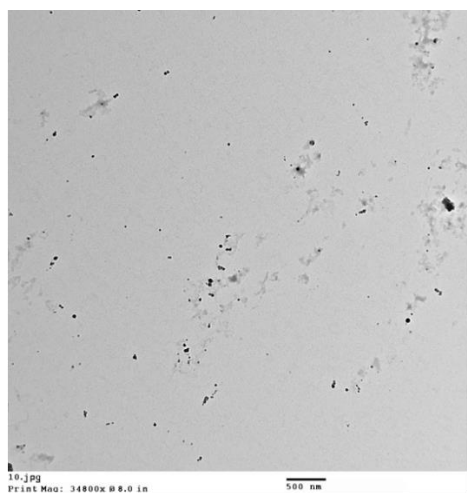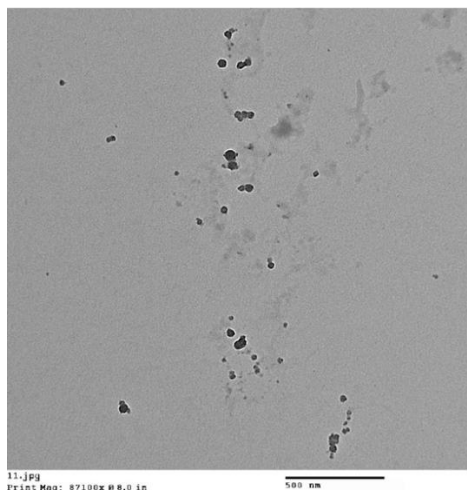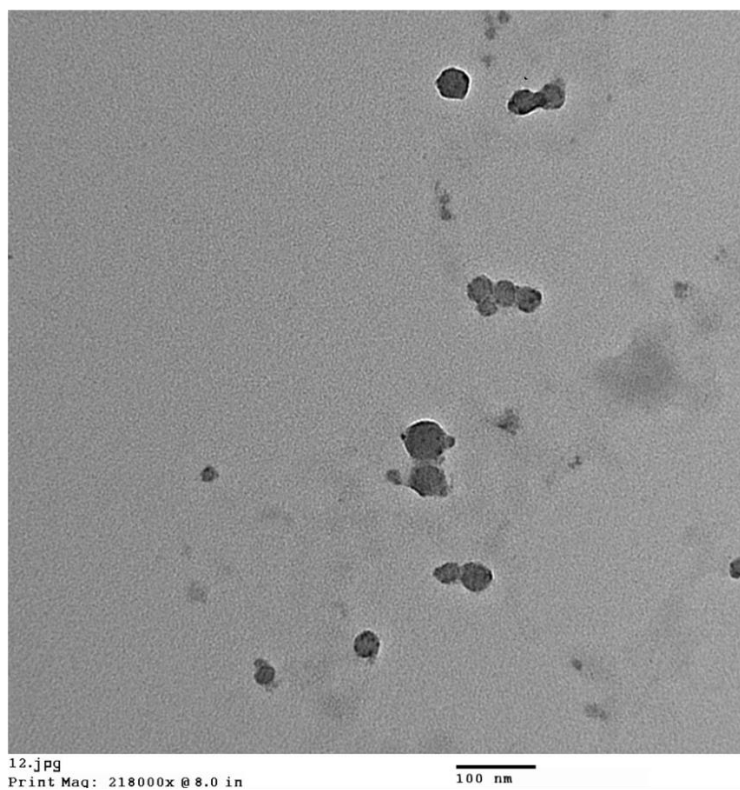

**$\{PW\}$ /P4VP complex NP**

Fig. S4 TEM images of  $\{PW\}$ /P4VP complex NPs.

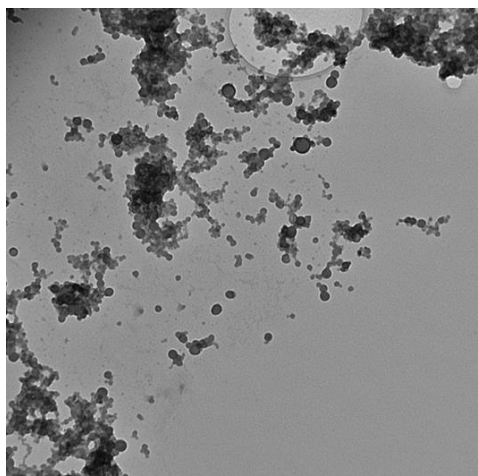

2.1.tif  
Print Mag: 87100x @ 8.0 in  
13:48 10/30/13  
TEM Mode: Imaging

500 nm  
HV=120kV  
Direct Mag: 10000x  
Tilt:

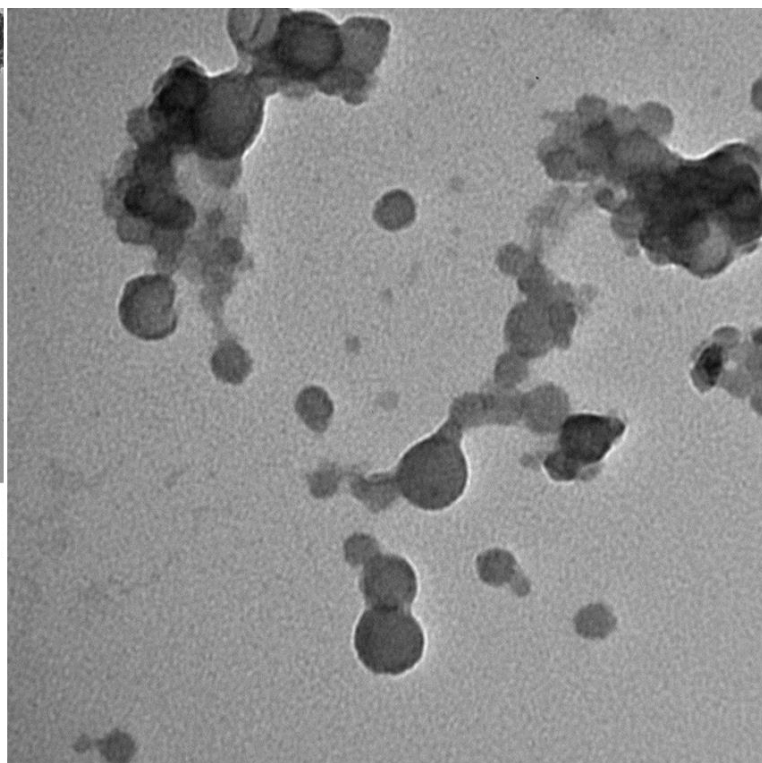

5.tif  
Print Mag: 436000x @ 8.0 in  
13:50 10/30/13  
TEM Mode: Imaging

100 nm  
HV=120kV  
Direct Mag: 50000x  
Tilt:  
University of Akron

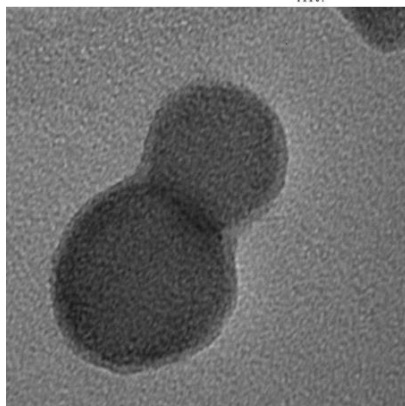

11.1.tif  
Print Mag: 1740000x @ 8.0 in  
13:55 10/30/13  
TEM Mode: Imaging

20 nm  
HV=120kV  
Direct Mag: 200000x  
Tilt:  
University of Akron

### {Keg}/P4VP complex NPs

Fig. S5 TEM images of {Keg}/P4VP complex NPs.

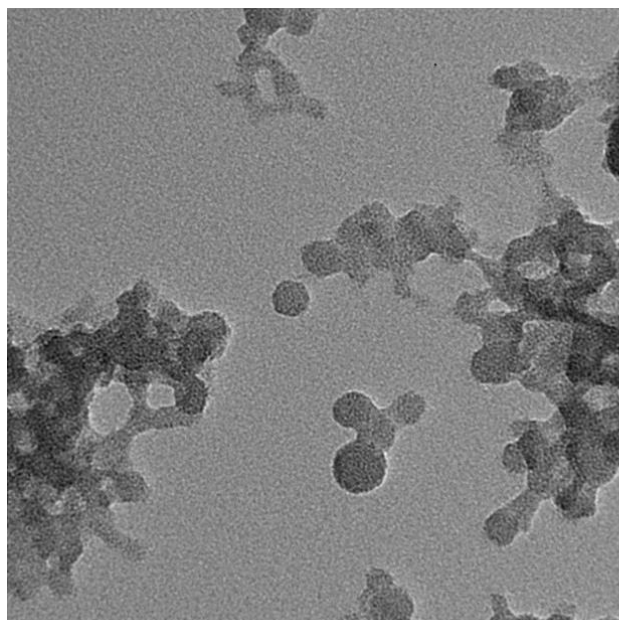

8.jpg  
Print Mag: 697000x @ 8.0 in  
14:22 09/26/13  
TEM Mode: Imaging

20 nm  
HV=120kV  
Direct Mag: 80000x  
Tilt:  
University of Akron

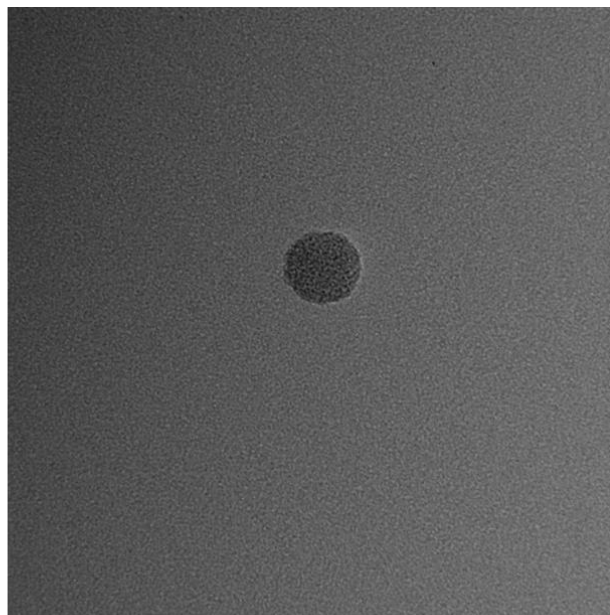

9.jpg  
Print Mag: 1050000x @ 8.0 in  
14:23 09/26/13  
TEM Mode: Imaging

20 nm  
HV=120kV  
Direct Mag: 120000x  
Tilt:  
University of Akron

## {Mo<sub>72</sub>V<sub>30</sub>}/P4VP complex NPs

Fig. S6 TEM images of {Mo<sub>72</sub>V<sub>30</sub>}/P4VP complex NPs.

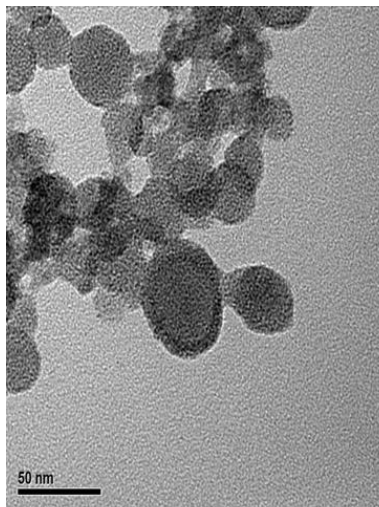

morphology

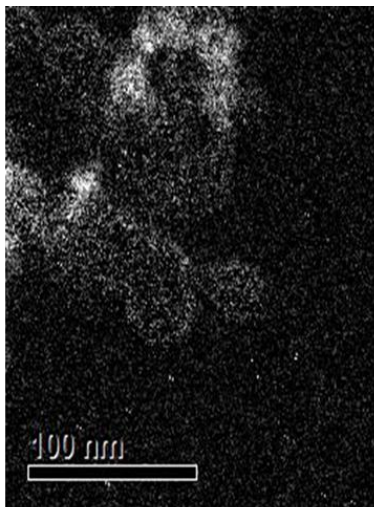

Mapping Fe

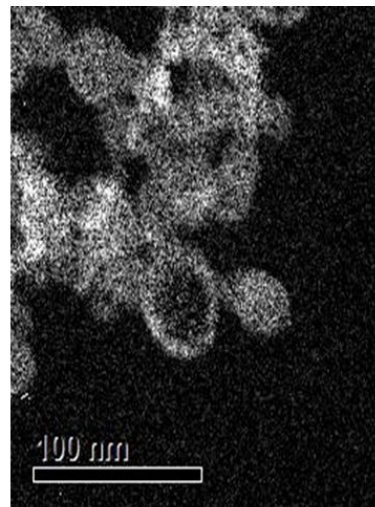

Mapping Mo

Fig. S7 more EFTEM images of {Mo<sub>72</sub>Fe<sub>30</sub>}/P4VP complex NPs.

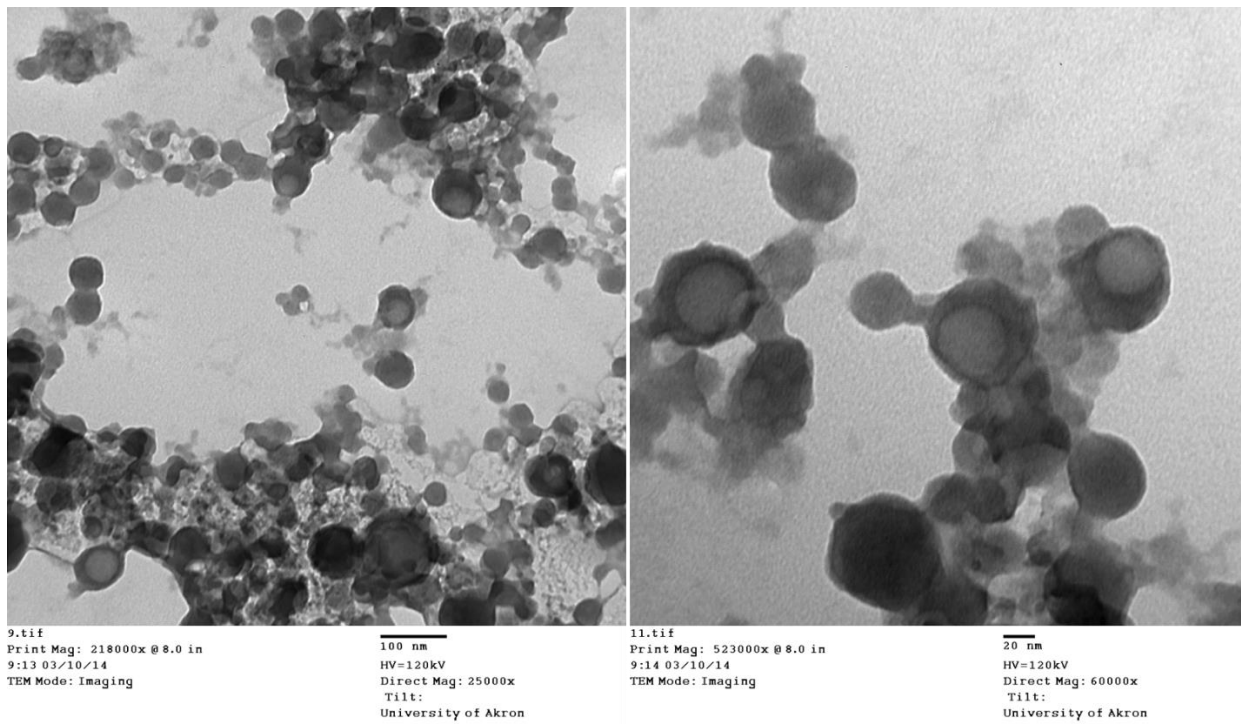

Fig. S8 TEM images of {SW}/P4VP complex NPs with extra 14 mg NaCl in the system.
